# Supplementary material for: Orange Juice or Fructose Intake Does Not Induce Oxidative and Inflammatory Response
Source: Oxford University Press journal article supplement (doi:10.2337/dc06-1458), 2007-05-25
Supplement: dc061458-sup-1458_onlineappendix.doc [file dc061458-sup-1458_onlineappendix.doc]

Appendix:

| **MNC incubated for 30 min with** | **ROS generation** | **(%)ROS generation** |
| --- | --- | --- |
| 5Mm Glucose+DMSO | 63±11 | 100 |
| 5Mm Glucose+DPI (10 nM) | 54±7 | 87±9 |
| 5Mm Glucose+DPI (50 nM) | 32±5 | 48±8 |
| 5Mm Glucose+DPI (250 nM) | 19±4 | 26±7 |
| 5Mm Glucose+DPI (1250 nM) | 11±5 | 15±8 |

Table 1: Inhibition of luminol-dependent ROS generation by DPI in MNC. Each point is the average of 3 determinations ±SE.

Fig. 1: On line appendix: http://care.adajournals.org: Plasma glucose levels following glucose, fructose orange juice and water ingestion. *****=*P*<0.001 for glucose and orange juice with RMANOVA, n=8 for all.

Fig. 2: On line appendix: http://care.adajournals.org: Plasma insulin levels following glucose, fructose orange juice and water ingestion. ***=***P*<0.001 for glucose and orange juice; **#** = *P*<0.01 for fructose with RMANOVA; $ *P*<0.05 2-factor RMANOVA for glucose and orange juice compared to water, n=8 for all.
